# Supplementary material
Source: ML conference proceedings conference paper supplement (https://proceedings.neurips.cc/paper_files/paper/2022/hash/70c26937fbf3d4600b69a129031b66ec-Abstract.html)
Supplement: Supplementary file 1 [file 70c26937fbf3d4600b69a129031b66ec-Supplemental-Conference.zip]

Archive with 2 entries (2 files):
- merging camera-ready supp.pdf
- __MACOSX/._merging camera-ready supp.pdf
